# Supplementary material for: Coupling complementary strategy to flexible graph neural network for quick discovery of coformer in diverse co-crystal materials
Source: PubMed Central journal article supplement (PMC8511140; doi:10.1038/s41467-021-26226-7), 2021-10-12
Supplement: 41467_2021_26226_MOESM2_ESM.pdf [file 41467_2021_26226_MOESM2_ESM.pdf]

## **Description of Additional Supplementary Files**

File Name: Supplementary Data 1

Description: Refcodes of positive cocrystal samples collected from Cambridge Structural Database.

File Name: Supplementary Data 2

Description: The Negative samples collected in this study.
